# Supplementary material
Source: PubMed Central journal article supplement (PMC3987747)
Supplement: NIHMS569168-supplement-Supplemental_Data.pdf [file NIHMS569168-supplement-Supplemental_Data.pdf]

Supplemental Figure 1

**A.**

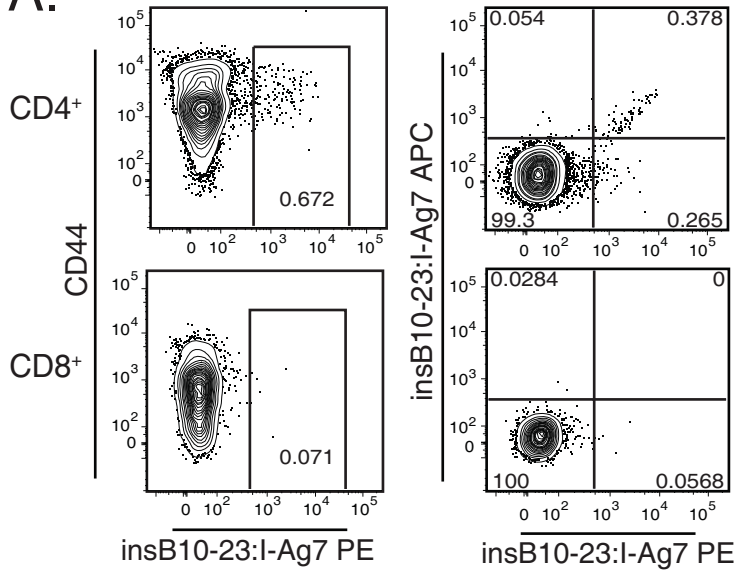

**B.**

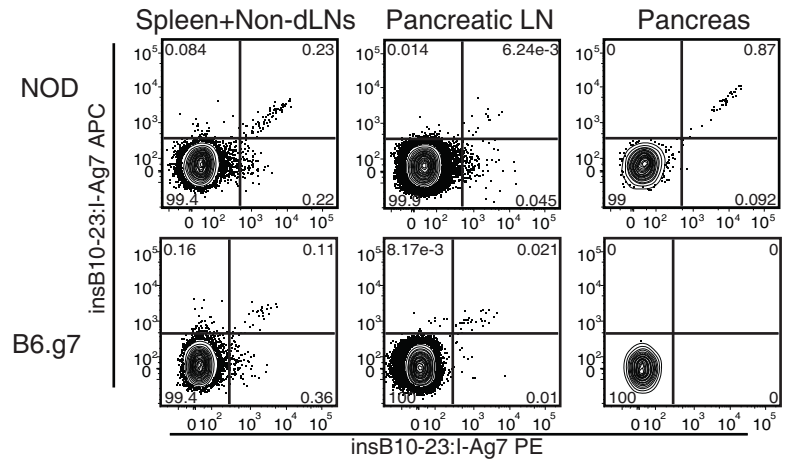

**C.**

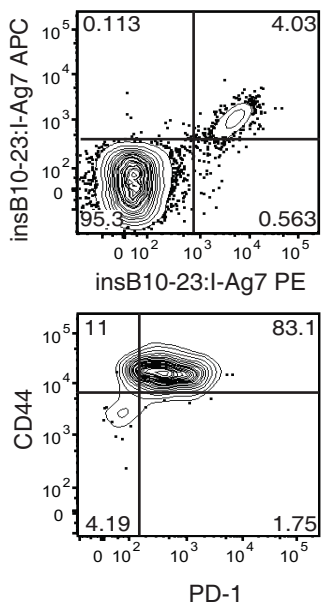

**D.**

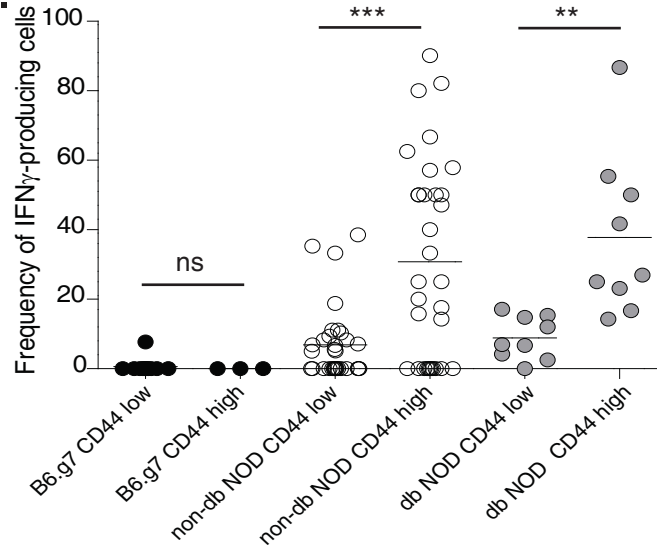

**E.**

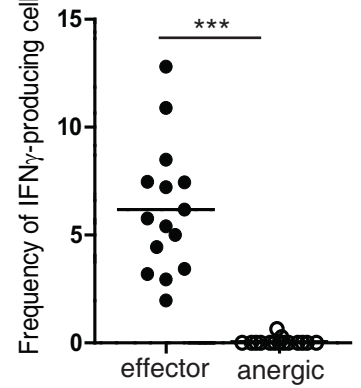

**F.**

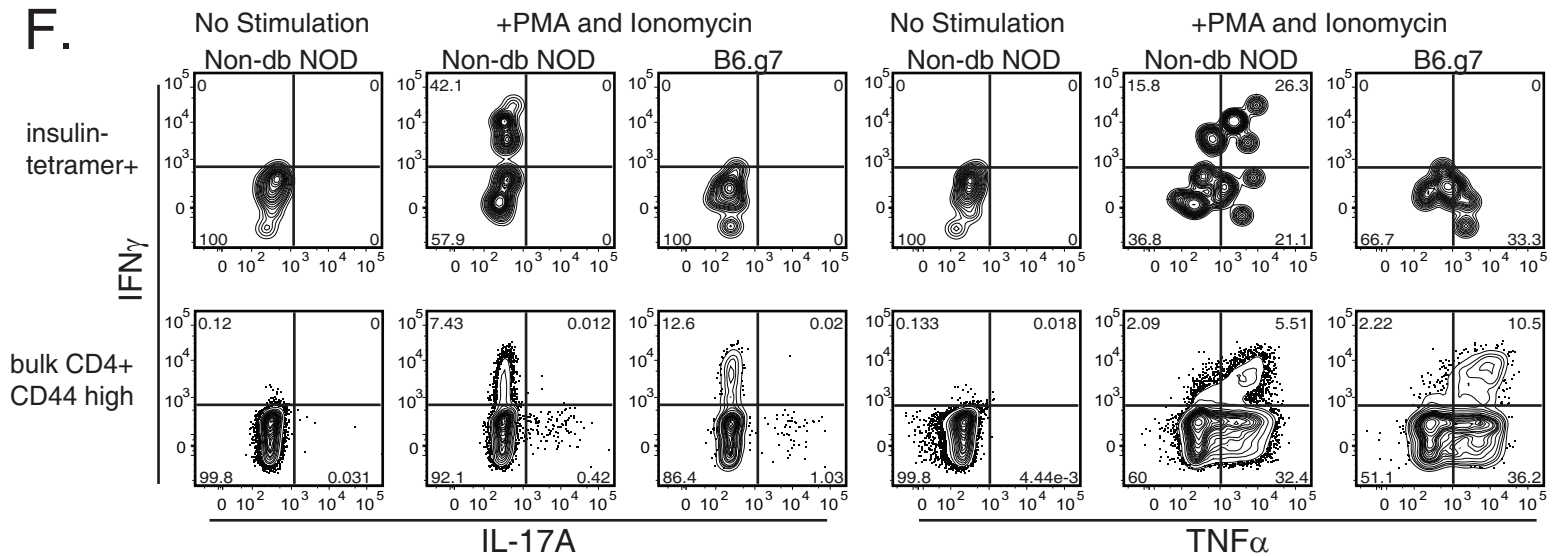

## Supplemental Data Figure 1

### Flow cytometric staining of tetramer positive CD4<sup>+</sup> T cells and intracellular cytokines.

(A) (Left) CD44 and InsB<sub>10-23r3</sub>:I-A<sup>g7</sup> staining from CD4<sup>+</sup> (top) and CD8<sup>+</sup> T cells (bottom) from the spleen and non-draining LNs of a non-diabetic NOD. (Right) Double tetramer staining with the InsB<sub>10-23r3</sub>:I-A<sup>g7</sup> tetramers in PE and allophycocyanin (APC). Data is representative of fifty-two mice from fifteen independent experiments. Cells were gated on singlet<sup>+</sup>, CD3<sup>+</sup>, B220<sup>-</sup>, CD11b<sup>-</sup>, CD11c<sup>-</sup>, and CD4<sup>+</sup> or CD8<sup>+</sup> cells.

(B) Flow cytometry plots from the spleen combined with non-draining LNs, pancreatic LN (pLN), or pancreas of non-diabetic NOD (20 week old non-diabetic mouse representative of 8 mice from five experiments) and B6.g7 (21 week old mouse representative of 8 mice from three experiments). Double tetramer staining with the InsB<sub>10-23r3</sub>:I-A<sup>g7</sup> tetramers in PE and APC. Cells were gated on singlet<sup>+</sup>, CD3<sup>+</sup>, B220<sup>-</sup>, CD11b<sup>-</sup>, CD11c<sup>-</sup>, and CD4<sup>+</sup>.

(C) Flow cytometry plots from the spleen combined with non-draining LNs and the pLN of a NOD mouse primed with whole insulin protein emulsified in CFA (25µg/mouse). (Top) Double tetramer staining with the InsB<sub>10-23r3</sub>:I-A<sup>g7</sup> tetramers in PE and APC. Cells were gated on singlet<sup>+</sup>, CD3<sup>+</sup>, B220<sup>-</sup>, CD11b<sup>-</sup>, CD11c<sup>-</sup>, and CD4<sup>+</sup>. (Bottom) CD44 and PD-1 expression on insulin-specific CD4<sup>+</sup> T cells from the upper right quadrant of the top flow plot. Cells are gated on singlet<sup>+</sup>, CD3<sup>+</sup>, B220<sup>-</sup>, CD11b<sup>-</sup>, CD11c<sup>-</sup>, and CD4<sup>+</sup> InsB<sub>10-23r3</sub>:I-A<sup>g7</sup> PE<sup>+</sup> and APC<sup>+</sup>. Data are representative of 14 NOD and 14 B6.g7 mice (9-10 weeks old) from five independent experiments.

(D) Frequency of CD44<sup>high</sup> or CD44<sup>low</sup> insulin-specific CD4<sup>+</sup> T cells from combined SLO (spleen+non-draining LN+pLN) producing IFN $\gamma$ . Data are compiled from nine experiments with B6.g7 (n=12), non-diabetic NOD (n=28), and diabetic NOD (n=9). Cells were gated on singlet<sup>+</sup>, B220<sup>-</sup>, CD11b<sup>-</sup>, CD11c<sup>-</sup>, CD4<sup>+</sup>, CD8a<sup>-</sup>, InsB<sub>10-23r3</sub>:I-A<sup>g7</sup>-PE<sup>+</sup> and InsB<sub>10-23r3</sub>:I-A<sup>g7</sup>-APC<sup>+</sup> and either CD44<sup>high</sup> or CD44<sup>low</sup>.

(E) Frequency of effector phenotype (FR4<sup>-</sup>CD73<sup>-</sup>CD44<sup>high</sup>Foxp3<sup>-</sup>) and anergic phenotype (FR4<sup>+</sup>CD73<sup>+</sup>CD44<sup>high</sup>Foxp3<sup>-</sup>) IFN $\gamma$ -producing CD4<sup>+</sup> T cells from the spleen of pre-diabetic NOD mice following 2-4 hours in vivo stimulation with 100 µg anti-CD3 intravenously (clone 145-2C11, Bio X Cell). Data are compiled from three independent experiments with a total n=15 mice.

(F) Flow cytometric plots of cytokine staining from insulin-specific CD4<sup>+</sup> T cells (top) compared to polyclonal CD4<sup>+</sup> CD44<sup>high</sup> cells (bottom). Cells were pooled from pLN, spleen, and non-draining LNs of non-diabetic NOD or B6.g7 mice. Data are representative of nine experiments with B6.g7 (n=12), non-diabetic NOD (n=28), and diabetic NOD (n=9). Cells were gated on singlet<sup>+</sup>, B220<sup>-</sup>, CD11b<sup>-</sup>, CD11c<sup>-</sup>, CD4<sup>+</sup>, CD8a<sup>-</sup>, CD44<sup>high</sup>, InsB<sub>10-23r3</sub>:I-A<sup>g7</sup> PE<sup>+</sup> and APC<sup>+</sup> cells (Top row), or singlet<sup>+</sup>, B220<sup>-</sup>, CD11b<sup>-</sup>, CD11c<sup>-</sup>, CD4<sup>+</sup>, CD8a<sup>-</sup>, tetramer<sup>-</sup>, CD44<sup>high</sup> (bottom row).

**Supplemental Table I. Quantification of insulin-specific CD4<sup>+</sup> T cells in NOD and B6.g7 mice.**

**A. Total Tetramer positive cells**

| <b>NOD</b>   | <b>Spleen+non-draining LNs</b> | <b>Pancreatic LN</b> | <b>Pancreas</b> |
|--------------|--------------------------------|----------------------|-----------------|
| 3 wks        | 200 ± 26                       | 185 ± 35             | 2.5 ± 1         |
| 5 wks        | 355 ± 36                       | 211 ± 19             | 1.8 ± 0.6       |
| 14 wks       | 1416 ± 739                     | 377 ± 71             | 130 ± 79        |
| 20 wks       | 618 ± 72                       | 183 ± 33             | 24 ± 10         |
| Diabetic     | 1156 ± 486                     | 356 ± 64             | 182 ± 83        |
| <b>B6.g7</b> |                                |                      |                 |
| <b>B6.g7</b> | <b>Spleen+non-draining LNs</b> | <b>Pancreatic LN</b> | <b>Pancreas</b> |
| 3 wks        | 159 ± 36                       | 28 ± 6               | 0 ± 0           |
| 5 wks        | 166 ± 19                       | 102 ± 18             | 0 ± 0           |
| 20 wks       | 184 ± 22                       | 86 ± 27              | 0 ± 0           |

**B. CD44<sup>high</sup> Tetramer positive cells**

| <b>NOD</b>   | <b>Spleen+non-draining LNs</b> | <b>Pancreatic LN</b> |
|--------------|--------------------------------|----------------------|
| 3 wks        | 69 ± 16                        | 48 ± 18              |
| 5 wks        | 122 ± 16                       | 132 ± 19             |
| 14 wks       | 878 ± 588                      | 201 ± 49             |
| 20 wks       | 218 ± 47                       | 53 ± 10              |
| Diabetic     | 605 ± 336                      | 139 ± 43             |
| <b>B6.g7</b> |                                |                      |
| <b>B6.g7</b> | <b>Spleen+non-draining LNs</b> | <b>Pancreatic LN</b> |
| 3 wks        | 8 ± 2.5                        | 3 ± 1                |
| 5 wks        | 11 ± 3.5                       | 6 ± 3                |
| 20 wks       | 13 ± 4                         | 5 ± 1.5              |

(A) InsB<sub>10-23r3</sub>:I-A<sup>B7</sup> cells that bind both the PE and allophycocyanin (APC) tetramer (double positive) in the spleen and non-dLNs, pLN, and pancreas of NOD and B6.g7 mice. Cells are gated on singlet<sup>+</sup>, CD3<sup>+</sup>, B220<sup>-</sup>, CD11b<sup>-</sup>, CD11c<sup>-</sup>, CD4<sup>+</sup>, CD8a<sup>-</sup>, InsB<sub>10-23r3</sub>:I-A<sup>B7</sup> PE<sup>+</sup> and InsB<sub>10-23r3</sub>:I-A<sup>B7</sup> APC<sup>+</sup>. Non-diabetic NOD data at 3 weeks (n=9), 5 weeks (n=13), 14 weeks (n=13), and 20 weeks (n=17). Diabetic NOD data is from six mice. Data from B6.g7 mice at 3 weeks (n=4), 5 weeks (n=7), and 20 weeks (n=8). (B) Cells from (A) are gated on CD44<sup>high</sup>.
